# Supplementary material for: Flexible pyridyloxy-substituted cyclotetraphosphazene platforms linked by silver(i)
Source: Royal Society of Chemistry journal article supplement (doi:10.1039/c3ce40395e), 2013-01-01
Supplement: c3ce40395e.pdf [file c3ce40395e.pdf]

## **ELECTRONIC SUPPLEMENTARY INFORMATION**

### **Flexible pyridyloxy-substituted cyclotetraphosphazene platforms linked by silver(I)**

**Eric W. Ainscough, Andrew M. Brodie, Ross J. Davidson, Geoffrey B.  
Jameson and Carl A. Otter**

*Chemistry – Institute of Fundamental Sciences, Massey University, Private Bag 11 222,  
Palmerston North, New Zealand 4442. E-mail: e.ainscough@massey.ac.nz;  
a.brodie@massey.ac.nz; Fax: +64-6-9-3569099*

## Single Crystal X-ray Structures: Selected Bond Lengths and Angles

**Table S1** Selected bond lengths (Å) and angles (°) for {[AgL]PF<sub>6</sub>]<sub>n</sub> (**1**)

|               |            |                 |            |
|---------------|------------|-----------------|------------|
| Ag1-N16       | 2.372(4)   | Ag1-N86#1       | 2.270(3)   |
| Ag1-N26       | 2.382(3)   | Ag1-N61#1       | 2.365(4)   |
| N1-P1         | 1.557(3)   | N3-P3           | 1.569(3)   |
| N1-P2         | 1.556(3)   | N3-P4           | 1.568(3)   |
| N2-P2         | 1.566(3)   | N4-P1           | 1.568(4)   |
| N2-P3         | 1.559(4)   | N4-P4           | 1.565(3)   |
| N16-Ag1-N26   | 116.51(12) | N26-Ag1-N86#1   | 115.53(12) |
| N16-Ag1-N86#1 | 98.96(12)  | N26-Ag1-N61#1   | 87.38(12)  |
| N16-Ag1-N61#1 | 102.26(13) | N61#1-Ag1-N86#1 | 136.94(12) |
| N1-P2-N2      | 122.34(19) | P1-N1-P2        | 139.4(2)   |
| N1-P1-N4      | 123.60(18) | P1-N4-P4        | 130.2(2)   |
| N2-P3-N3      | 122.27(18) | P2-N2-P3        | 136.4(2)   |
| N4-P4-N3      | 123.15(19) | P3-N3-P4        | 131.9(2)   |

Symmetry transformations used to generate equivalent atoms:

#1  $x+1/2, -y+1/2, z-1/2$  #2  $x-1/2, -y+1/2, z+1/2$

**Table S2** Selected bond lengths (Å) and angles (°) for {[Ag<sub>2</sub>L](PF<sub>6</sub>)<sub>2</sub>]<sub>n</sub> (**2**)

|              |           |              |           |
|--------------|-----------|--------------|-----------|
| Ag1-N11      | 2.549(7)  | Ag1-N41A     | 2.367(13) |
| Ag1-N21      | 2.242(7)  | Ag1-N51      | 2.255(14) |
| Ag1-N41B     | 2.141(13) |              |           |
| P1-N1        | 1.535(10) | P3-N2        | 1.534(9)  |
| P1-N4        | 1.595(10) | P3-N3        | 1.519(10) |
| P2-N1        | 1.576(9)  | P4-N3        | 1.564(10) |
| P2-N2        | 1.557(9)  | P4-N4        | 1.521(10) |
| N11-Ag1-N21  | 93.5(2)   | N21-Ag1-N41A | 157.5(4)  |
| N11-Ag1-N41A | 100.7(4)  | N21-Ag1-N41B | 149.9(4)  |
| N11-Ag1-N41B | 98.5(4)   | N41A-Ag1-N51 | 97.6(6)   |
| N11-Ag1-N51  | 104.6(4)  | N41B-Ag1-N51 | 105.6(10) |
| N21-Ag1-N51  | 95.5(4)   |              |           |
| N1-P1-N4     | 124.6(9)  | P1-N1-P2     | 134.9(8)  |
| N1-P2-N2     | 117.3(7)  | P2-N2-P3     | 139.6(7)  |
| N4-P4-N3     | 118.0(8)  | P3-N3-P4     | 128.4(9)  |
| N2-P3-N3     | 125.9(7)  | P4-N4-P1     | 135.1(6)  |

**Table S3** Selected bond lengths (Å) and angles (°) for [Ag<sub>2</sub>L(CF<sub>3</sub>SO<sub>3</sub>)<sub>2</sub>] (**3**)

|             |          |             |           |
|-------------|----------|-------------|-----------|
| Ag1-N31     | 2.473(8) | Ag2-N21     | 2.332(8)  |
| Ag1-N51     | 2.343(7) | Ag2-N41     | 2.231(9)  |
| Ag1-N71     | 2.334(7) | Ag2-N61     | 2.253(9)  |
| Ag1-O9      | 2.467(9) | Ag2-O7A     | 2.431(13) |
| N1-P1       | 1.582(8) | N3-P3       | 1.561(8)  |
| N1-P2       | 1.558(7) | N3-P4       | 1.563(8)  |
| N2-P2       | 1.563(8) | N4-P1       | 1.567(8)  |
| N2-P3       | 1.571(8) | N4-P4       | 1.556(9)  |
| N31-Ag1-N51 | 132.0(2) | N21-Ag2-N41 | 119.4(3)  |
| N31-Ag1-N71 | 97.8(3)  | N21-Ag2-N61 | 93.8(3)   |
| N51-Ag1-N71 | 130.2(3) | N41-Ag2-N61 | 143.3(3)  |
| N31-Ag1-O9  | 89.7(3)  | N21-Ag2-O7A | 105.3(4)  |
| N51-Ag1-O9  | 92.1(3)  | N41-Ag2-O7A | 102.0(4)  |
| N71-Ag1-O9  | 86.6(3)  | N61-Ag2-O7A | 82.0(4)   |
| N1-P2-N2    | 121.5(4) | P1-N1-P2    | 136.3(6)  |
| N1-P1-N4    | 120.3(5) | P1-N4-P4    | 128.6(5)  |
| N2-P3-N3    | 121.9(4) | P2-N2-P3    | 129.4(6)  |
| N3-P4-N4    | 119.3(4) | P3-N3-P4    | 126.5(6)  |

**Table S4** Selected bond lengths (Å) and angles (°) for {[Ag<sub>2</sub>L(CF<sub>3</sub>SO<sub>3</sub>)<sub>2</sub>].C<sub>4</sub>H<sub>10</sub>O}<sub>n</sub> (**4**)

|                 |            |                 |            |
|-----------------|------------|-----------------|------------|
| Ag1-N11#1       | 2.231(2)   | Ag1-N31         | 2.4292(19) |
| Ag1-N41#2       | 2.2456(19) | Ag1-O12#3       | 2.6246(17) |
| N1-P1           | 1.5722(18) | N2-P2           | 1.5571(19) |
| N1-P2           | 1.5729(18) | N2-P1#4         | 1.5635(19) |
| N11#1-Ag1-N41#2 | 150.14(7)  | N11#1-Ag1-O12#3 | 84.92(6)   |
| N11#1-Ag1-N31   | 109.72(7)  | N41#2-Ag1-O12#3 | 111.81(6)  |
| N41#2-Ag1-N31   | 96.29(7)   | N31-Ag1-O12#3   | 86.51(6)   |
| N1-P2-N2        | 120.95(9)  | P1-N1-P2        | 128.91(12) |
| N1-P1-N2#4      | 119.41(10) | P2-N2-P1#4      | 139.42(11) |

Symmetry transformations used to generate equivalent atoms:

#1 x+1,y,z #2 -x+2,-y+1,-z+2 #3 -x+2,-y,-z+1 #4 -x+1,-y+1,-z+2

**Table S5** Selected bond lengths (Å) and angles (°) for  
{[Ag<sub>3</sub>MeL(CH<sub>3</sub>CN)<sub>2</sub>](PF<sub>6</sub>)<sub>3</sub>·2CH<sub>3</sub>CN}<sub>n</sub> (**5**)

---

|               |           |             |           |
|---------------|-----------|-------------|-----------|
| Ag1-N11       | 2.180(10) | Ag2-N92     | 2.428(13) |
| Ag1-N51#1     | 2.172(10) | Ag3-N41     | 2.181(9)  |
| Ag2-N21       | 2.181(10) | Ag3-N61     | 2.153(10) |
| Ag2-N81       | 2.190(10) | Ag3-N90     | 2.397(14) |
|               |           |             |           |
| N1-P1         | 1.567(9)  | N3-P2       | 1.537(9)  |
| N1-P4         | 1.569(10) | N3-P3       | 1.587(9)  |
| N2-P1         | 1.570(11) | N4-P3       | 1.557(11) |
| N2-P2         | 1.542(11) | N4-P4       | 1.556(11) |
|               |           |             |           |
| N51#1-Ag1-N11 | 170.6(4)  | N61-Ag3-N41 | 161.9(4)  |
| N21-Ag2-N81   | 157.9(4)  | N61-Ag3-N90 | 99.9(4)   |
| N21-Ag2-N92   | 96.0(4)   | N41-Ag3-N90 | 97.6(4)   |
| N81-Ag2-N92   | 106.1(4)  |             |           |
|               |           |             |           |
| N1-P1-N2      | 120.8(5)  | P1-N2-P2    | 144.3(7)  |
| N1-P4-N4      | 121.5(5)  | P1-N1-P4    | 130.7(6)  |
| N2-P2-N3      | 122.1(5)  | P3-N3-P2    | 131.0(6)  |
| N3-P3-N4      | 120.9(5)  | P4-N4-P3    | 144.3(7)  |

---

Symmetry transformations used to generate equivalent atoms: #1 x,y-1,z

---

**Table S6** Selected bond lengths (Å) and angles (°) for  
[Ag<sub>4</sub>MeL(CF<sub>3</sub>SO<sub>3</sub>)(CH<sub>3</sub>CN)<sub>3</sub>](CF<sub>3</sub>SO<sub>3</sub>)<sub>3</sub> (**6**)

|              |            |              |            |
|--------------|------------|--------------|------------|
| Ag1-N11      | 2.185(4)   | Ag3-O23      | 2.630(3)   |
| Ag1-N31      | 2.189(4)   | Ag3-N41      | 2.169(4)   |
| Ag1-N90      | 2.523(6)   | Ag3-N61      | 2.167(4)   |
| Ag2-N21      | 2.190(4)   | Ag4-N51      | 2.209(5)   |
| Ag2-N81      | 2.188(4)   | Ag4-N71      | 2.208(5)   |
| Ag2-N91B     | 2.61(2)    | Ag4-N92A     | 2.49(2)    |
| Ag2-N91A     | 2.66(2)    | Ag4-N92B     | 2.486(15)  |
| Ag2-O21      | 2.631(3)   |              |            |
| P1-N1        | 1.575(4)   | P3-N2        | 1.566(4)   |
| P1-N4        | 1.571(4)   | P3-N3        | 1.568(4)   |
| P2-N1        | 1.564(4)   | P4-N3        | 1.562(4)   |
| P2-N2        | 1.565(4)   | P4-N4        | 1.566(4)   |
| N11-Ag1-N31  | 161.10(16) | N61-Ag3-N41  | 169.40(15) |
| N11-Ag1-N90  | 105.57(19) | N51-Ag4-N71  | 162.01(16) |
| N31-Ag1-N90  | 90.43(19)  | N51-Ag4-N92A | 101.6(8)   |
| N21-Ag2-N91B | 99.9(6)    | N51-Ag4-N92B | 95.8(6)    |
| N21-Ag2-N91A | 89.5(5)    | N71-Ag4-N92A | 91.2(8)    |
| N21-Ag2-N81  | 162.62(16) | N71-Ag4-N92B | 98.2(5)    |
| N81-Ag2-N91B | 91.3(6)    | Ag2-O21-S2   | 145.5(4)   |
| N81-Ag2-N91A | 101.5(5)   | Ag3-O23-S2   | 111.1(7)   |
| P1-N1-P2     | 129.3(3)   | N1-P1-N4     | 122.7(2)   |
| P1-N4-P4     | 129.6(3)   | N1-P2-N2     | 129.3(3)   |
| P2-N2-P3     | 130.6(3)   | N2-P3-N3     | 122.1(2)   |
| P4-N3-P3     | 130.1(3)   | N3-P4-N4     | 122.5(2)   |
